## **Peripartum cardiomyopathy and hypertensive disorders of pregnancy and cardiovascular events among 1.6 million California pregnancies**

Rima Arnaout MD<sup>a</sup>, Gregory Nah MS<sup>a</sup>, Gregory M. Marcus MD, MAS<sup>a</sup>, Zian H. Tseng MD, MAS<sup>a</sup>, Elyse Foster MD<sup>a</sup>, Ian Harris MD<sup>a</sup>, Punag Divanji MD<sup>a</sup>, Liviu Klein MD<sup>a</sup>, Juan M. Gonzalez MD, MS, PhD<sup>b</sup>, Nisha I. Parikh MD MPH<sup>a,c</sup>

<sup>a</sup> Division of Cardiology, Department of Medicine, University of California San Francisco, San Francisco, CA.

<sup>b</sup> Division of Maternal-Fetal Medicine, Department of Obstetrics, Gynecology and Reproductive Sciences, University of California San Francisco, San Francisco, CA

<sup>c</sup> Preterm Birth Initiative, University of California San Francisco, San Francisco, CA

### **Corresponding Author:**

Nisha I. Parikh, MD MPH

University of California, San Francisco

555 Mission Bay Boulevard South Room 352T

San Francisco, CA 94158

415-514-0992

[nisha.parikh@ucsf.edu](mailto:nisha.parikh@ucsf.edu), @NishaParikh1

**Word Count:** 6,466

1 **Abstract**

2 **Background**—Cardiovascular complications during and soon after pregnancy present an  
3 opportunity to assess risk for subsequent cardiovascular disease. We sought to determine  
4 whether peripartum cardiomyopathy and hypertensive disorder of pregnancy subtypes predict  
5 future myocardial infarction, heart failure, or stroke independent of one another and independent  
6 of other risks like gestational diabetes, preterm birth, and intrauterine growth restriction.

7 **Methods and Results**—The California Healthcare Cost and Utilization Project database was  
8 used to identify all hospitalized pregnancies from 2005-2009, with follow-up through 2011, for a  
9 retrospective cohort study. Pregnancies, exposures, covariates and outcomes were defined by  
10 ICD-9 codes. Among 1.6 million pregnancies (mean age 28y; median follow-up time to event  
11 2.7y), 558 cases of peripartum cardiomyopathy, 123,603 cases of hypertensive disorders of  
12 pregnancy, 107,636 cases of gestational diabetes, 116,768 preterm births, and 23,504 cases of  
13 intrauterine growth restriction were observed. Using multivariable Cox proportional hazards  
14 models, peripartum cardiomyopathy was independently associated with a 13.0-fold increase in  
15 myocardial infarction [95%CI, 4.1-40.9], a 39.2-fold increase in heart failure [95%CI, 30.0-  
16 51.9], and a 7.7-fold increase in stroke [95%CI, 2.4-24.0]. Hypertensive disorders of pregnancy  
17 were associated with a 1.4 [95%CI, 1.0-2.0] to 7.6 [95%CI, 5.4-10.7] fold higher risk of  
18 myocardial infarction, heart failure, and stroke. Gestational diabetes, preterm birth, and  
19 intrauterine growth restriction had more modest associations with CVD.

20 **Conclusions**—These findings support close monitoring of women with cardiovascular  
21 pregnancy complications for prevention of early subsequent cardiovascular events and further  
22 study of mechanisms underlying their development.

- 1 Key Words: peripartum cardiomyopathy, hypertensive disorders of pregnancy, cardiovascular
- 2 disease, women

## 1 **Introduction**

2 Cardiovascular disease (CVD) is a significant and often underappreciated cause of morbidity and  
3 mortality in women(1). Pregnancy can often “unmask” CVD in women(2,3). In the estimated 85  
4 percent of women who experience a pregnancy during their lifetime, cardiovascular  
5 complications during pregnancy and childbirth therefore present an opportunity to assess risk for  
6 later CVD(4). Indeed, leveraging early phenotypes to identify those at risk for CVD as soon as  
7 possible is an aspirational goal for both precision medicine(5,6) and for primary CVD disease  
8 prevention(7,8).

9 Peripartum cardiomyopathy (PPCM) and hypertensive disorders of pregnancy (HDP) are  
10 two major cardiovascular complications of pregnancy and have been reported to share a common  
11 underlying pathophysiology in animal studies(9-11). PPCM is characterized by the sudden onset  
12 of maternal heart failure presenting either in the last month of pregnancy or in the first five  
13 months postpartum. Hypertension in pregnancy is defined as a blood pressure equal to or greater  
14 than 140/90 mmHg; gestational onset is defined at or after 20 weeks’ gestation (**Online Table 2**).

15 We hypothesized that specific subtypes of PPCM and HDP may carry different CVD  
16 risks(12)(13). Recent data from a Danish nationwide register–based cohort demonstrated that  
17 specific subtypes of HDP (i.e. severe preeclampsia, moderate preeclampsia and gestational  
18 hypertension) conferred differing risks of incident cardiomyopathy(14). Still, prior studies have  
19 not fully elucidated the independent risks of PPCM and HDP subtypes on specific CVD  
20 outcomes [i.e. myocardial infarction (MI), heart failure (HF), and stroke]. The availability of a  
21 large cohort of women directly representative of the general population of California in the  
22 California Healthcare Cost and Utilization Project (HCUP) allowed us to determine the risks of  
23 PPCM and HDP subtypes along a spectrum of chronicity and severity for subsequent MI, HF,

- 1 and stroke, while independently adjusting for other demographic and pregnancy-related factors
- 2 that are known to be associated with later maternal CVD [i.e. gestational diabetes mellitus
- 3 (GDM), preterm delivery and intrauterine growth restriction (IUGR)](15-17).

## 1 **Methods**

### 2 *Study Sample*

3 We used the California Healthcare Cost and Utilization Project (HCUP) database  
4 (<https://www.hcup-us.ahrq.gov/>), which provides state-specific data for all inpatient, emergency,  
5 and ambulatory visits. HCUP contains information collected as part of medical billing, including  
6 patient demographics, International Classification of Diseases, Ninth Revision (ICD-9)  
7 diagnoses, expected payer, dates of admission and discharge, and follow-up. We identified the  
8 first delivery from all patients ages 18 and older in HCUP from 2005-2009 by ICD-9 code  
9 (n=1,686,601). During the 2005-2009 study period, after excluding those with a non-California  
10 residence (n=2,734), missing information on age (n=2,742) or race/ethnicity (n=11,434), data  
11 were available in California HCUP for 1,669,691 pregnancies. Among those 1,669,691  
12 remaining pregnancies we excluded those with pre-existing MI, HF, stroke, and congenital(18)  
13 or valvular heart disease using ICD-9 codes (n=7,646), leaving 1,662,045 eligible pregnancies  
14 for this study. Congenital heart disease diagnoses were classified according to methods  
15 previously described.(18) The number of pregnancies in our study cohort represents 7.8% of all  
16 pregnancies in the United States within the same time period(19). Analyses were performed in  
17 accordance with the HCUP Data Use Agreement. To preserve patient anonymity, any groups in  
18 which there were fewer than 10 patients are listed in Tables as <10.

19

### 20 *Exposures*

21 After pregnancies were identified, we defined instances of PPCM, HDP subtypes, GDM, preterm  
22 birth, and IUGR by ICD-9 code (**Online Table 1**). We considered both principal and secondary  
23 diagnoses to identify these pregnancy exposures.

1           We further divided PPCM into diagnoses made pre-partum (PPCM diagnoses already  
2 present at delivery) and those made post-partum (PPCM diagnosis appearing within 5 months  
3 post-delivery). We defined HDP as one of the following: chronic HTN, gestational HTN,  
4 preeclampsia, chronic HTN with gestational HTN, chronic HTN with preeclampsia and no HTN  
5 or PPCM (referent) (**Online Table 2**).

6

### 7 *Outcomes*

8 Primary CVD outcomes were admissions for MI, HF, and stroke defined by ICD-9 codes  
9 (**Online Table 1**). MI subtypes were defined as MI with CAD (MICAD) and MI with non-  
10 obstructive coronary arteries (MINOCA). MINOCA includes MI from stress cardiomyopathy,  
11 hypercoagulable state, coronary artery dissection, coronary artery anomaly, and coronary  
12 vasospasm.(20) MINOCA was defined using its ICD-9 code as well as 1) having had a  
13 myocardial infarction using ICD-9 codes 410.00-410.92; 2) having had a cardiac catheterization  
14 or computed tomography coronary angiogram (inpatient or outpatient, defined by CPT code)  
15 within 7 days of index event; and 3) having had an ICD-9 code for a MINOCA subtype. ICD-9  
16 codes used for MINOCA subtypes were 413.1 for coronary vasospasm; 414.12 for coronary  
17 artery dissection; 429.83 for Takotsubo/stress cardiomyopathy; 289.81 for hypercoagulable state;  
18 and 746.85 for coronary anomaly.

19           Stroke was further subdivided into ischemic, embolic, and hemorrhagic etiologies.

20 Among our study cohort, systolic vs diastolic HF, and left vs right HF were not well specified  
21 and thus we were unable to distinguish among these HF subtypes. ICD-9 codes defining the  
22 outcomes are found in **Online Table 1**.

23

1 *Covariates*

2 We adjusted for covariates known to be associated with PPCM, hypertension, CVD, and  
3 peripartum morbidity and mortality(21) which could potentially confound the associations we  
4 were interested in studying. Covariates included age, race, insurance status, median household  
5 income, chronic kidney disease, pre-existing diabetes, obesity, drug abuse, smoking, multiple  
6 gestations, as well as each of the exposures. Patients with preexisting (prior to pregnancy) HTN  
7 were considered to have baseline chronic hypertension and were included within the HDP  
8 variable; therefore, we did not include HTN as a covariate.

9

10 *Statistical Analyses*

11 *Primary analyses.* We considered our baseline period in which initial delivery occurred from  
12 2005-2009. Follow-up began 6 months after delivery in order to avoid double-counting an  
13 exposure and outcome, and it lasted until the end of 2011. Descriptive statistics were performed  
14 including n's, means and percentages with standard deviations and interquartile ranges as  
15 appropriate among all participants and within PPCM and HDP subtypes. We tested the  
16 assumption of proportionality of hazards for PPCM and HDP subtypes and MI, HF, and stroke.  
17 We found that one of the five HDP subtypes, *de novo* preeclampsia, violated the assumption  
18 ( $p=0.02$ ). Therefore, in the case of *de novo* preeclampsia, our hazard ratio estimates represent an  
19 average across the length of study follow-up. We employed multivariable Cox proportional  
20 hazards models to determine the association between PPCM and HDP and subsequent CVD,  
21 adjusting for the potential confounders listed in the covariates section above. We considered  
22 GDM, preterm delivery and IUGR as secondary exposures and considered these in multivariable  
23 models adjusting for PPCM and HDP.



1  
2 *Secondary analyses.* It is known that certain pregnancy complications beget further  
3 comorbidities: for example, hypertensive disorders of pregnancy can be risk factors for  
4 PPCM(14). *Overlap.* We assessed pregnancy exposures for overlap. Similarly, we assessed for  
5 overlap among our CVD outcomes of interest. Finally, since specific subtypes of MI and stroke  
6 may be more common in younger individuals and among women, we analyzed outcomes by  
7 subtype. For example, we assessed how many of the MI's in our population were due to MICAD  
8 vs MINOCA, and how many of the incident strokes were from hemorrhagic versus ischemic  
9 versus embolic etiologies. As mentioned above, ICD-9 codes for HF subtypes were not specified  
10 in the study cohort. We also considered PPCM as intra- or postpartum in order to determine  
11 whether timing of PPCM affected CVD outcomes. *Stratification.* In addition to our original  
12 multivariable Cox proportional hazards model (see Primary analyses), we re-ran the model i)  
13 stratifying on quintiles of age rather than using age as a covariate and ii) stratifying by preterm  
14 birth and PPCM, preeclampsia and PPCM, and IUGR and PPCM.

15  
16 All analyses were performed using SAS version 9.4X. A p-value of 0.05 or less was considered  
17 statistically significant. Certification to use de-identified HCUP data was obtained from the  
18 University of California, San Francisco Committee on Human Research. No informed consent  
19 was required.

## 1 **Results**

### 2 ***Characteristics of study population.***

3           Of the 1,662,045 study participants who delivered from 2005-2009 in HCUP-CA,  
4 579,656 (35%) were non-Hispanic white women, 105,489 (6%) were African-American,  
5 648,602 (39%) were Hispanic, and 200,908 (12%) were Asian or Pacific Islanders. 20,765  
6 (1.2%) of pregnancies were complicated by drug abuse, and 11,248 (0.7%) of pregnancies were  
7 complicated by active smoking. 330,946 deliveries were second pregnancies within the study  
8 period. In terms of additional risk factors for cardiovascular complications, 23,108 (1.4%) of  
9 pregnant women had pre-existing hypertension, 16,806 (1.0%) had pre-existing diabetes, and  
10 538 (0.3%) had chronic kidney disease. Notably, the prevalence of African Americans, chronic  
11 HTN, and obesity was higher in the PPCM group than in the general population. The prevalence  
12 of Asian and Pacific Islanders was higher in the GDM group. **Table 1** summarizes these and  
13 other characteristics of the study cohort.

14

### 15 ***Prevalence of pregnancy exposures in study population.***

16 There were 558 cases of PPCM, 97 of which were diagnosed before delivery, and 461 of which  
17 were diagnosed postpartum. There were 49,114 cases of gestational HTN and 62,162 cases of  
18 preeclampsia; broken down by HDP subtypes of interest, there were 12,458 cases of isolated  
19 chronic HTN, 43,073 cases of *de novo* gestational HTN, 56,419 cases of *de novo* preeclampsia,  
20 4,907 pregnancies with both chronic HTN and superimposed gestational HTN, and 5,743  
21 pregnancies with chronic HTN and superimposed preeclampsia (**Table 2**). There were 107,636  
22 cases of GDM, 23,504 cases of IUGR, and 116,768 cases of preterm birth. Median follow-up  
23 time to event was 2.68 years, ranging from 1 day to 6.84 years, resulting in 0.99, 1.23, and 1.02

1 cases of MI, HF, and stroke, respectively, per 1000 person-years. **Online Table 3** demonstrates  
2 the overlap and correlations among pregnancy exposure categories. Preterm birth and  
3 preeclampsia were the most highly correlated (Kendall-Tau correlation coefficient 0.146)  
4 whereas IUGR and peripartum cardiomyopathy had the lowest correlation (Kendall-Tau  
5 correlation coefficient 0.0017) among pregnancy exposures studied.

6  
7 ***Multivariable models demonstrated associations between exposures and future cardiovascular***  
8 ***risk.***

9 Among all women hospitalized during pregnancy from 2005-2009, there were 558 subsequent  
10 MIs, 3284 subsequent cases of HF, and 973 subsequent strokes. **Table 2** shows stroke, MI, and  
11 HF event numbers by pregnancy exposure category. Of the  
12 330,946 pregnancies (of the total ~1.6 million pregnancies) which were second pregnancies  
13 within the study period, 24 had MI (24 of 558), 133 had HF (133 of 3284), and 37 had stroke (37  
14 of 973). Using multivariable Cox proportional hazards models adjusting for all exposures and  
15 covariates, we found that PPCM was independently associated with a 13.0-fold increased risk of  
16 MI (95% CI 4.1-40.9), a 39.2-fold increased risk of HF (95% CI 30.0 – 51.9), and a 7.7-fold  
17 increased risk of stroke (95% CI 2.4-24.0; **Figure 1; Table 2**). The hazard ratios were similar for  
18 PPCM diagnosed at or before delivery when compared to PPCM diagnosed in the first five  
19 months postpartum (**Figure 1**).

20 We investigated cardiovascular risks according to hypertensive disorder of pregnancy  
21 subtypes of differing chronicity and severity. We examined five subtypes: chronic hypertension  
22 alone, *de novo* gestational hypertension, *de novo* preeclampsia, chronic hypertension with  
23 superimposed gestational hypertension, and chronic hypertension with superimposed

1 preeclampsia (**Online Table 2**). These subtypes carried a 2.3-6.3-fold increased risk for MI, a  
2 2.5-5.4-fold increased risk for HF, and a 1.4-7.6-fold increased risk for stroke (**Figure 2; Table**  
3 **2**). Although there was some overlap in 95% confidence intervals, chronic HTN alone, and with  
4 superimposed preeclampsia, carried the highest risks of MI, HF and stroke compared with other  
5 HDP subtypes. Chronic HTN with superimposed gestational hypertension did not demonstrate a  
6 statistically significant increased risk for MI; the n in this group was less than 10.

7 All of our models additionally included GDM, preterm birth, and IUGR. IUGR  
8 was related to risk of MI but not HF or stroke [HR for MI=1.6 (95% CI: 1.0-2.5)]. Preterm  
9 delivery was significantly associated with MI, stroke and HF (Figure 2; Table 2). GDM was  
10 associated with risks of stroke and HF but not with MI (**Figure 2; Table 2**). Overall, these three  
11 pregnancy exposures conferred comparatively lower risks for cardiovascular diseases as  
12 compared to PPCM and HDP.

13

14 ***Tests for residual confounding in the multivariable model show robust associations between***  
15 ***exposures and outcomes.***

16 Age is a well-known and strong predictor both for both cardiovascular complications of  
17 pregnancy and for our outcomes of interest; (21,22) and increased prevalence of exposures and  
18 outcomes by age was again demonstrated in our study (**Online Table 4**). We therefore sought to  
19 test for residual confounding by age in our multivariable model. We compared hazard ratios  
20 derived from our original model to those obtained using an alternate approach stratifying on  
21 quintiles of age rather than using age as a covariate (thereby avoiding the assumptions of the  
22 proportional hazards model). We found that this alternate approach did not change hazard ratio  
23 point estimates or 95% confidence intervals by more than a point (data not shown).

1 We also ran additional models stratifying by preterm birth and PPCM, preeclampsia and  
2 PPCM, and IUGR and PPCM, and did not find substantial differences in hazard ratio point  
3 estimates or 95% confidence intervals (data not shown).

4

#### 5 *Secondary analyses.*

6 With respect to exposures, excepting the HDP subtypes of gestational HTN & chronic HTN and  
7 preeclampsia & chronic HTN, where clinical overlap was present by design (10.3% and 9.24%  
8 overlap, respectively), there was notable overlap between PPCM and preeclampsia (26.1%),  
9 preeclampsia and preterm birth (26.0%) between chronic HTN and preterm birth (18.8%).  
10 Overlap among all other categories ranged from 1.49% to 10.6% (**Online Table 3**).

11 With respect to outcomes, PPCM is known to be a risk factor for HF but has not  
12 previously been described as a risk factor for MI or stroke (**Figure 1, Table 2**). To determine  
13 whether there was overlap in MI, HF, and stroke outcome diagnoses in patients with PPCM that  
14 might explain our observations, we queried ICD-9 diagnoses for each individual patient in the  
15 PPCM exposure group. Most categories of overlap had fewer than 10 patients; for example,  
16 fewer than 10 out of 58 patients with PPCM (6.9%) had overlapping outcome diagnoses (for  
17 HF/stroke and HF/MI). No single PPCM exposure had all three outcome diagnoses. Among  
18 patients with hypertensive disorder of pregnancy subtypes, GDM, preterm birth, and IUGR  
19 exposures, the percentage of patients with more than one outcome diagnosis ranged from 5.74%  
20 to 11.37%. Therefore, the majority of observed outcomes were separate cardiovascular events.

21 We then asked whether heart failure could be a mediator of MI and stroke among patients  
22 with PPCM and overlapping outcome diagnoses. We re-fitted our MI and stroke models with  
23 heart failure as a time-dependent covariate. With heart failure as a mediator, the risk of PPCM

1 for MI decreased from 13.0 (95% CI 4.1-40.9) to 4.6 (95% CI 1.4-14.8) and the risk of PPCM  
2 for stroke decreased from 7.6 (95% CI) to not significant (2.7 95% CI 0.8–8.5). Therefore,  
3 although there were novel significant associations between PPCM and MI and PPCM and stroke,  
4 heart failure mediated much of those associations.

5 Finally, we analyzed outcomes by MI and stroke subtypes (**Table 3**). Based on ICD-9  
6 coding, we found that the predominant type of MI experienced within the follow-up period was  
7 MICAD, and the most common type of stroke was ischemic stroke.

## 1 **Discussion**

### 2 ***Summary of Findings.***

3 In this retrospective cohort study of over 1.6 million deliveries representing nearly every  
4 completed pregnancy in California over a 5-year period, we report the following: i) PPCM is  
5 associated with risks for MI and stroke in addition to (and partly mediated by) HF; ii) HDP  
6 subtypes were associated with risks for MI, stroke, and HF; iii) subtypes of HDP representing a  
7 longer duration of hypertension and a higher severity (i.e. chronic HTN and chronic HTN with  
8 superimposed preeclampsia) had the greatest magnitudes of risks for MI, stroke and HF; iv)  
9 GDM, preterm birth, and IUGR were independently associated with risks for future CVD when  
10 accounting for PPCM and HDP; and v) PPCM and HDP were independently associated with  
11 CVD when accounting for these other CVD-related pregnancy complications. Stratification by  
12 age and by selected exposures did not significantly change observed hazard ratios, suggesting  
13 these findings are robust to potential residual confounding.

14 We found that the above cardiovascular pregnancy complications were associated with  
15 substantial risks for MI, HF, and stroke even within the first six years post-delivery. In contrast  
16 to long-held belief that heart disease largely affects women who are long past their child-bearing  
17 years, we demonstrate that the presence of cardiovascular complications of pregnancy can  
18 identify a sub-population of younger women who are at high risk for premature cardiovascular  
19 disease. Our findings are relevant given the recent call to attention and study concerning the  
20 growing epidemic of MI in younger women by scientific experts(7) and support initiatives  
21 designed to follow younger at-risk women more closely for CVD prevention(22).

22 PPCM is hypothesized to have several different causes, including genetic mutations, fetal  
23 autoimmunity, vascular dysfunction, in addition to HDP itself(23-25). Furthermore, PPCM

1 presenting during pregnancy may represent a different clinical entity as compared to PPCM  
2 presenting postpartum(12) and may have different underlying genetic underpinnings(13). Despite  
3 this, our findings did not suggest that intrapartum and postpartum PPCM as coded in HCUP  
4 conferred differing risks for CVD. Despite overlapping pathophysiology between PPCM and  
5 HDP(26), PPCM has a relatively greater magnitude of risk for incident CVD than any of the  
6 HDP subtypes studied.

7         Given that preterm birth, IUGR, and GDM have demonstrated associations with  
8 CVD(27-29) and are commonly seen with HDP and PPCM, we studied these as secondary  
9 exposures and did find that each was significantly associated with one or more subtypes of CVD,  
10 confirming findings from prior investigations. HDP is a common reason for medically indicated  
11 preterm delivery. Several lines of evidence suggest that a common pathology in many cases of  
12 preterm birth and IUGR, as well as subtypes of HDP and PPCM and HDP, is vascular  
13 dysfunction of varying chronicity and severity.(30-34) GDM is a risk factor for future diabetes  
14 and its attendant microvascular and macrovascular effects(35) which may explain the  
15 associations seen between GDM and stroke, as well as HF.

16

### 17 ***Strengths and Limitations.***

18         As a statewide record, California HCUP provided generalizable data from a large and  
19 ethnically diverse population and has been used to uncover several insights into cardiovascular  
20 disease(18,36,37). Age, race, and ethnicity in the study cohort were similar to those of national  
21 CDC birth records for the same time period(19). HCUP captures over 95 percent of California's  
22 population, which comprises over 38 million people. Large datasets like HCUP can facilitate  
23 defining phenotypes at greater resolution, such as the pregnancy complication subtypes analyzed



1 in this paper and in other work from our group(18). In addition to several exposures, we were  
2 also able to adjust for several potential confounders, which clarified the effects of each exposure  
3 on future cardiovascular risk. Increasing phenotypic resolution at scale can help uncover new  
4 associations and inspire new hypotheses on the mechanisms of disease. Here we demonstrate for  
5 the first time that PPCM, a relatively rare event, carried risks not only for future HF but also for  
6 MI and stroke as well, and that these associations, while mediated in part by HF, are not simply  
7 explained by overlap of outcome diagnoses.

8 In terms of magnitude, PPCM conferred the highest magnitude of hazard ratios for future  
9 CVD, followed by chronic HTN with superimposed preeclampsia, and then chronic HTN alone.  
10 Whereas PPCM and HDP have been demonstrated to exist on a common pathophysiologic  
11 spectrum(11,26), we demonstrate that their respective association with later cardiovascular  
12 disease differ in magnitude of risk. Further basic and translational studies are needed to  
13 determine the specific pathophysiologic mechanisms that connect PPCM and HDP with later  
14 CVD.

15 Relatively short follow-up time (maximum of 6.84 years) likely resulted in an  
16 underestimation of risk along the lifetimes of the individuals studied. Also, with small numbers  
17 in some groups after adjustment for several covariates, 95% confidence intervals for several  
18 exposure subtypes were wide. Given the significant associations found despite these caveats, the  
19 hazard ratios measured in this study may in fact be underestimates of true cardiovascular risk  
20 following a pregnancy complicated by PPCM and/or HDP.

21 Despite using a large dataset like HCUP, our analysis of exposure and outcome subtypes  
22 were potentially limited due to misclassification bias and to a lack availability of certain  
23 diagnostic codes. We attempted to assess the extent of misclassification bias in our study. HCUP

1 data is anonymized, precluding the ability to perform manual chart review of the ICD-9 coding  
2 used to define exposures, covariates, and outcomes. We found that prevalence of preterm birth  
3 was similar to national estimates; prevalence of PPCM, and GDM were similar to previous  
4 reports in smaller California cohorts in which diagnoses were confirmed by manual chart  
5 review(19,21). Literature review of ICD-9 coding for preeclampsia, gestational HTN, and  
6 hypertensive disorders of pregnancy shows low sensitivity and high specificity(38) while ICD-9  
7 coding for outcomes like MI, HF, and stroke shows high sensitivity and specificity(39-41). If  
8 these trends are also true within HCUP, it would suggest that the hazard ratios reported in this  
9 study are likely accurate, but could be underestimates of true risk. Despite these shortcomings,  
10 our analysis shows several robust signals indicating increased CVD risk among exposures of  
11 interest.

12 Finally, the lack of certain diagnostic codes limited our ability to perform detailed  
13 analysis of outcome subtypes (e.g., HF subtypes) or distinguish between HF class. When  
14 defining MI and stroke by outcome subtype, there were not enough numbers to perform  
15 statistical analysis; the national HCUP database may provide adequate numbers for such an  
16 analysis.

17 In this study, we demonstrated that PPCM is associated with near-term HF, MI and stroke  
18 in women in California, independent of HDP, GDM, preterm delivery and IUGR. Among HDP  
19 subtypes, chronicity and severity of HTN increased risk of subsequent HF, MI and stroke. While  
20 these results are independent of age, the increased prevalence of exposures and outcomes with  
21 age in the face of national birth patterns with women giving birth at older ages mean that we can  
22 expect even more PPCM, HDP, and CVD in pregnant women. The importance of pregnancy as a  
23 cardiovascular ‘stress test’ will, therefore, only further expand in the future.

1

2 **Conclusions**

3           Our findings support close monitoring of women with cardiovascular pregnancy  
4 complications for prevention of subsequent, near-term CVD events and begs further study of  
5 potential mechanisms underlying the development of these early CVD events.

1 **Sources of Funding:**

2 R.A. was supported by the NIH (K08HL125945) and American Heart Association

3 (15GPSPG238300004). Z.T. was supported by NIH R01 H1102090, NIH R01 HL126555, CDC

4 DP14-1403, and NIH R24 A1067039. N.I.P. was supported by NIH R21 7R21HL115398.

5

6 **Disclosures:**

7 The authors have no disclosures.

## 1 **References**

- 2 1. Mosca L, Hammond G, Mochari-Greenberger H et al. Fifteen-year trends in awareness of  
3 heart disease in women: results of a 2012 American Heart Association national survey.  
4 *Circulation* 2013;127:1254-63, e1-29.
- 5 2. Khan NA, Daskalopoulou SS, Karp I et al. Sex differences in prodromal symptoms in  
6 acute coronary syndrome in patients aged 55 years or younger. *Heart* 2016.
- 7 3. Hemal K, Pagidipati NJ, Coles A et al. Sex Differences in Demographics, Risk Factors,  
8 Presentation, and Noninvasive Testing in Stable Outpatients With Suspected Coronary Artery  
9 Disease: Insights From the PROMISE Trial. *JACC Cardiovasc Imaging* 2016;9:337-46.
- 10 4. Parikh NI, Jeppson RP, Berger JS et al. Reproductive Risk Factors and Coronary Heart  
11 Disease in the Women's Health Initiative Observational Study. *Circulation* 2016;133:2149-58.
- 12 5. Robinson PN. Deep phenotyping for precision medicine. *Hum Mutat* 2012;33:777-80.
- 13 6. Delude CM. Deep phenotyping: The details of disease. *Nature* 2015;527:S14-5.
- 14 7. Nabel EG. Heart Disease Prevention in Young Women: Sounding an Alarm. *Circulation*  
15 2015;132:989-91.
- 16 8. Goff DC, Jr., Lloyd-Jones DM, Bennett G et al. 2013 ACC/AHA guideline on the  
17 assessment of cardiovascular risk: a report of the American College of Cardiology/American  
18 Heart Association Task Force on Practice Guidelines. *Circulation* 2014;129:S49-73.
- 19 9. Aoyama K, Suzuki Y, Sato T et al. Cardiac failure caused by severe pre-eclampsia with  
20 placental abruption, and its treatment with anti-hypertensive drugs. *J Obstet Gynaecol Res*  
21 2003;29:339-42.

- 1 10. Mann DL, Zipes DP, Libby P, Bonow RO, Braunwald E. Braunwald's heart disease : a  
2 textbook of cardiovascular medicine. Tenth edition. ed. Philadelphia, PA: Elsevier/Saunders,  
3 2015.
- 4 11. Patten IS, Rana S, Shahul S et al. Cardiac angiogenic imbalance leads to peripartum  
5 cardiomyopathy. *Nature* 2012;485:333-8.
- 6 12. Krishnamoorthy P, Garg J, Palaniswamy C et al. Epidemiology and outcomes of  
7 peripartum cardiomyopathy in the United States: findings from the Nationwide Inpatient Sample.  
8 *J Cardiovasc Med (Hagerstown)* 2016;17:756-61.
- 9 13. Ware JS, Seidman JG, Arany Z. Shared Genetic Predisposition in Peripartum and Dilated  
10 Cardiomyopathies. *N Engl J Med* 2016;374:2601-2.
- 11 14. Behrens I, Basit S, Lykke JA et al. Association Between Hypertensive Disorders of  
12 Pregnancy and Later Risk of Cardiomyopathy. *JAMA : the journal of the American Medical*  
13 *Association* 2016;315:1026-33.
- 14 15. Savitz DA, Danilack VA, Elston B, Lipkind HS. Pregnancy-induced hypertension and  
15 diabetes and the risk of cardiovascular disease, stroke, and diabetes hospitalization in the year  
16 following delivery. *Am J Epidemiol* 2014;180:41-4.
- 17 16. Wenger NK. Recognizing pregnancy-associated cardiovascular risk factors. *The*  
18 *American journal of cardiology* 2014;113:406-9.
- 19 17. Manten GT, Sikkema MJ, Voorbij HA, Visser GH, Bruinse HW, Franx A. Risk factors  
20 for cardiovascular disease in women with a history of pregnancy complicated by preeclampsia or  
21 intrauterine growth restriction. *Hypertens Pregnancy* 2007;26:39-50.
- 22 18. Hayward RM, Foster E, Tseng ZH. Maternal and Fetal Outcomes of Admission for  
23 Delivery in Women With Congenital Heart Disease. *JAMA cardiology* 2017;2:664-671.

- 1 19. Martin JA, Hamilton BE, Ventura SJ, Osterman MJ, Wilson EC, Mathews TJ. Births:  
2 final data for 2010. *Natl Vital Stat Rep* 2012;61:1-72.
- 3 20. Pasupathy S, Tavella R, Beltrame JF. Myocardial Infarction With Nonobstructive  
4 Coronary Arteries (MINOCA): The Past, Present, and Future Management. *Circulation*  
5 2017;135:1490-1493.
- 6 21. Gunderson EP, Croen LA, Chiang V, Yoshida CK, Walton D, Go AS. Epidemiology of  
7 peripartum cardiomyopathy: incidence, predictors, and outcomes. *Obstetrics and gynecology*  
8 2011;118:583-91.
- 9 22. Cusimano MC, Pudwell J, Roddy M, Cho CK, Smith GN. The maternal health clinic: an  
10 initiative for cardiovascular risk identification in women with pregnancy-related complications.  
11 *Am J Obstet Gynecol* 2014;210:438 e1-9.
- 12 23. Fett JD. Peripartum cardiomyopathy: A puzzle closer to solution. *World J Cardiol*  
13 2014;6:87-99.
- 14 24. Ntusi NB, Badri M, Gumedze F, Sliwa K, Mayosi BM. Pregnancy-Associated Heart  
15 Failure: A Comparison of Clinical Presentation and Outcome between Hypertensive Heart  
16 Failure of Pregnancy and Idiopathic Peripartum Cardiomyopathy. *PloS one* 2015;10:e0133466.
- 17 25. Ware JS, Li J, Mazaika E et al. Shared Genetic Predisposition in Peripartum and Dilated  
18 Cardiomyopathies. *N Engl J Med* 2016;374:233-41.
- 19 26. Bello N, Rendon IS, Arany Z. The relationship between pre-eclampsia and peripartum  
20 cardiomyopathy: a systematic review and meta-analysis. *Journal of the American College of*  
21 *Cardiology* 2013;62:1715-23.
- 22 27. Tanz LJ, Stuart JJ, Williams PL et al. Preterm Delivery and Maternal Cardiovascular  
23 Disease in Young and Middle-Aged Adult Women. *Circulation* 2017;135:578-589.

- 1 28. Srinivas SK, Edlow AG, Neff PM, Sammel MD, Andrela CM, Elovitz MA. Rethinking  
2 IUGR in preeclampsia: dependent or independent of maternal hypertension? *J Perinatol*  
3 2009;29:680-4.
- 4 29. Cirillo PM, Cohn BA. Pregnancy complications and cardiovascular disease death: 50-  
5 year follow-up of the Child Health and Development Studies pregnancy cohort. *Circulation*  
6 2015;132:1234-42.
- 7 30. Tomimatsu T, Mimura K, Endo M, Kumasawa K, Kimura T. Pathophysiology of  
8 preeclampsia: an angiogenic imbalance and long-lasting systemic vascular dysfunction.  
9 *Hypertens Res* 2017;40:305-310.
- 10 31. Grand'Maison S, Pilote L, Okano M, Landry T, Dayan N. Markers of Vascular  
11 Dysfunction After Hypertensive Disorders of Pregnancy: A Systematic Review and Meta-  
12 Analysis. *Hypertension* 2016;68:1447-1458.
- 13 32. Di Martino D, Zullino S, Casati D et al. C1. Maternal hemodynamic profile in  
14 hypertensive disorders of pregnancy (HDP) and intrauterine growth restriction. *J Matern Fetal*  
15 *Neonatal Med* 2016;29:11.
- 16 33. Boeldt DS, Bird IM. Vascular adaptation in pregnancy and endothelial dysfunction in  
17 preeclampsia. *J Endocrinol* 2017;232:R27-R44.
- 18 34. Banerjee M, Cruickshank JK. Pregnancy as the prodrome to vascular dysfunction and  
19 cardiovascular risk. *Nat Clin Pract Cardiovasc Med* 2006;3:596-603.
- 20 35. Gunderson EP, Chiang V, Pletcher MJ et al. History of Gestational Diabetes Mellitus and  
21 Future Risk of Atherosclerosis in Mid-life: The Coronary Artery Risk Development in Young  
22 Adults Study. *Journal of the American Heart Association* 2014;3:e000490.



- 1 36. Walkey AJ, Wiener RS, Ghobrial JM, Curtis LH, Benjamin EJ. Incident stroke and  
2 mortality associated with new-onset atrial fibrillation in patients hospitalized with severe sepsis.  
3 JAMA : the journal of the American Medical Association 2011;306:2248-54.
- 4 37. Dewland TA, Olgin JE, Vittinghoff E, Marcus GM. Incident atrial fibrillation among  
5 Asians, Hispanics, blacks, and whites. Circulation 2013;128:2470-7.
- 6 38. Klemmensen AK, Olsen SF, Osterdal ML, Tabor A. Validity of preeclampsia-related  
7 diagnoses recorded in a national hospital registry and in a postpartum interview of the women.  
8 Am J Epidemiol 2007;166:117-24.
- 9 39. McCormick N, Bhole V, Lacaille D, Avina-Zubieta JA. Validity of Diagnostic Codes for  
10 Acute Stroke in Administrative Databases: A Systematic Review. PLoS One 2015;10:e0135834.
- 11 40. McCormick N, Lacaille D, Bhole V, Avina-Zubieta JA. Validity of heart failure  
12 diagnoses in administrative databases: a systematic review and meta-analysis. PLoS One  
13 2014;9:e104519.
- 14 41. McCormick N, Lacaille D, Bhole V, Avina-Zubieta JA. Validity of myocardial infarction  
15 diagnoses in administrative databases: a systematic review. PLoS One 2014;9:e92286.
- 16

1 **Figure Legends**

2 **Figure 1. Adjusted associations between peripartum cardiomyopathy and myocardial**  
3 **infarction, heart failure, and stroke.** Hazard ratios for all PPCM (black diamond), as well as  
4 PPCM diagnosed prior to delivery (open square) and postpartum (black triangle). Covariates  
5 included age, race, insurance status, median household income, chronic kidney disease, pre-  
6 existing diabetes, obesity, drug abuse, smoking, multiple gestations, as well as for each of the  
7 exposures (PPCM, HDP subtypes, GDM, IUGR, and preterm birth).

8

9 **Figure 2. Adjusted associations between hypertensive disorder of pregnancy subtypes and**  
10 **myocardial infarction, heart failure, and stroke.** Hazard ratios for HDP subtypes, GDM,  
11 IUGR and preterm birth and MI, HF, and stroke. Covariates included age, race, insurance status,  
12 median household income, chronic kidney disease, pre-existing diabetes, obesity, drug abuse,  
13 smoking, multiple gestations, as well as for each of the exposures (PPCM, HDP subtypes, GDM,  
14 IUGR, and preterm birth).

15 **Tables**

16 **Table 1. Patient characteristics.** Baseline characteristics for patients included in the analysis; those with preexisting MI, heart  
 17 failure, stroke, and congenital or valvular heart disease were excluded.

|                         | <b>PPCM</b> | <b>Gestational HTN</b> | <b>Preeclampsia</b> | <b>GDM</b>  | <b>Uncomplicated Pregnancies†</b> |
|-------------------------|-------------|------------------------|---------------------|-------------|-----------------------------------|
| <b>N</b>                | 558         | 47,980                 | 62,162              | 107,636     | 1,455,554                         |
| <b>Mean Age (SD)</b>    | 31 (7)      | 28 (7)                 | 28 (7)              | 32 (6)      | 28 (6)                            |
| <b>Race/Ethnicity</b>   |             |                        |                     |             |                                   |
| non-Hispanic white      | 174 (31%)   | 18801 (39%)            | 19994 (32%)         | 28153 (26%) | 515843 (35%)                      |
| Black                   | 116 (21%)   | 4427 (9%)              | 5693 (9%)           | 4774 (4%)   | 91344 (6%)                        |
| Hispanic                | 133 (24%)   | 17198 (36%)            | 26458 (43%)         | 44794 (42%) | 565042 (39%)                      |
| Asian/Pacific Islander  | 82 (15%)    | 4236 (9%)              | 5572 (9%)           | 21705 (20%) | 171072 (12%)                      |
| Other                   | 47 (8%)     | 2658 (6%)              | 3610 (6%)           | 6553 (6%)   | 77394 (5%)                        |
| Native American         | <10 (<2%)*  | 660 (1%)               | 835 (1%)            | 1657 (2%)   | 34859 (2%)                        |
| <b>Income</b>           |             |                        |                     |             |                                   |
| First quartile          | 155 (28%)   | 13088 (27%)            | 18729 (30%)         | 26292 (24%) | 389006 (27%)                      |
| Second quartile         | 145 (26%)   | 12637 (26%)            | 16252 (26%)         | 27992 (26%) | 378219 (26%)                      |
| Third quartile          | 132 (24%)   | 11509 (24%)            | 14619 (24%)         | 26721 (25%) | 350629 (24%)                      |
| Fourth quartile         | 126 (23%)   | 10746 (22%)            | 12562 (20%)         | 26631 (25%) | 337700 (23%)                      |
| <b>Insurance Status</b> |             |                        |                     |             |                                   |
| Medicare                | <10 (<2%)*  | 166 (0.35%)            | 317 (1%)            | 441 (0.4%)  | 4380 (0.3%)                       |

|                                 |                     |                   |                   |                   |                   |
|---------------------------------|---------------------|-------------------|-------------------|-------------------|-------------------|
| Medicaid                        | 222 (40%)           | 17903 (37%)       | 24814 (40%)       | 33902 (32%)       | 536653 (37%)      |
| Private insurance               | 311 (56%)           | 28530 (59%)       | 35165 (57%)       | 71157 (66%)       | 869142 (60%)      |
| Self-pay                        | 11 (2%)             | 588 (1%)          | 874 (1%)          | 824 (0.8%)        | 20183 (1%)        |
| Other                           | <10 (<2%)*          | 793 (2%)          | 992 (2%)          | 1312 (1%)         | 25196 (2%)        |
|                                 |                     |                   |                   |                   |                   |
| <b>Hospitalization</b>          |                     |                   |                   |                   |                   |
| Mean Cost (SD)                  | \$36,979 (\$49,863) | \$17316 (\$15642) | \$30194 (\$29414) | \$21068 (\$22192) | \$16458 (\$13948) |
| Days to re-hospitalization      | 74 (204)            | 679 (381)         | 642 (399)         | 676 (378)         | 665 (386)         |
|                                 |                     |                   |                   |                   |                   |
| <b>Comorbidities</b>            |                     |                   |                   |                   |                   |
| Drug Abuse                      | 21 (4%)             | 792 (2%)          | 1244 (2%)         | 691 (0.6%)        | 18145 (1%)        |
| Diabetes                        | 22 (4%)             | 1146 (2%)         | 2554 (4%)         | 656 (0.6%)        | 12570 (0.8%)      |
| Chronic HTN                     | 50 (9%)             | 4907 (10%)        | 5743 (9%)         | 4261 (4%)         | 10016(0.7%)       |
| Obesity                         | 71 (13%)            | 3842 (8%)         | 5215 (8%)         | 7858 (7%)         | 32986 (2%)        |
| Chronic Kidney Disease          | <10 (<2%)*          | 30 (0.07%)        | 236 (0.4%)        | 50 (0.05%)        | 246 (0.02%)       |
| Cesarean Section                | 87 (16%)            | 4794 (10%)        | 6323 (10%)        | 20619 (19%)       | 182361 (13%)      |
| Multiple births                 | <10 (<2%)*          | 44 (0.1%)         | 237 (0.4%)        | 164 (0.15%)       | 644 (0.04%)       |
| Smoking (active)                | 12 (2%)             | 374 (0.8%)        | 537 (0.9%)        | 605 (0.6%)        | 9807 (0.7%)       |
| Still Birth                     | <10 (<2%)*          | 286 (0.6%)        | 621 (1%)          | 485 (0.5%)        | 8661 (0.6%)       |
| Preterm birth                   | 100 (18%)           | 4565 (10%)        | 16167 (26%)       | 10654 (10%)       | 87895 (6%)        |
| Intrauterine growth restriction | 14 (3%)             | 1267 (3%)         | 3217 (5%)         | 1609 (1%)         | 17779 (1%)        |
| Family history of CVD           | <10 (<2%)*          | 94 (0.2%)         | 303 (0.5%)        | 346 (0.3%)        | 2578 (0.2%)       |
| Baseline DM                     | 15 (3%)             | 881 (2%)          | 2009 (3%)         | 1979 (2%)         | 10081 (0.7%)      |

18 \* In accordance with HCUP policies, categories in which there were fewer than 10 patients are represented simply as <10.

- 19 † Uncomplicated pregnancies in this context are defined as pregnancies uncomplicated by PPCM, gestational HTN, preeclampsia, or  
20 GDM.
- 21 SD = Standard Deviation; CVD = Cardiovascular Disease; PPCM = Peripartum Cardiomyopathy; HTN = Hypertension; DM =  
22 Diabetes Mellitus; GDM = Gestational DM; IUGR = Intrauterine Growth Restriction.

23 **Table 2. Multivariable-adjusted associations between pregnancy complications and myocardial infarction, heart failure, and**  
 24 **stroke.**

| All eligible pregnancies<br>N = 1,662,045                                     | Myocardial<br>Infarction<br>MV adjusted HR<br>(95% CI)<br>n = 558 | Heart Failure<br>MV adjusted HR<br>(95% CI)<br>n = 3,284      | Stroke<br>MV adjusted HR<br>(95% CI)<br>n = 973          |
|-------------------------------------------------------------------------------|-------------------------------------------------------------------|---------------------------------------------------------------|----------------------------------------------------------|
| PPCM<br>n = 558<br>1.66 per 1000 person-years                                 | 13.0 (4.1-40.9)<br>n = <10*<br>N/A                                | 39.2 (30.0 – 51.9)<br>n = 56<br>2.19 per 1000<br>person-years | 7.7 (2.4-24.0)<br>n = <10*<br>N/A                        |
| No PPCM (referent)<br>n=1,661,487<br>0.58 per 1000 person-years               | 1.0<br>n=549<br>0.98 per 1000<br>person-years                     | 1.0<br>n=3228<br>1.22 per 1000<br>person-years                | 1.0<br>n=964<br>1.01 per 1000<br>person-years            |
| HP subtypes:                                                                  |                                                                   |                                                               |                                                          |
| Chronic HTN<br>n = 12,458<br>0.54 per 1000 person-years                       | 6.3 (4.6-8.7)<br>n = 47<br>0.90 per 1000<br>person-years          | 3.9 (3.3-4.7)<br>n = 152<br>1.12 per 1000<br>person-years     | 3.4 (2.4-4.8)<br>n = 37<br>0.88 per 1000<br>person-years |
| <i>De novo</i><br>gestational HTN<br>n = 43,073<br>5.98 per 1000 person-years | 2.3 (1.6-3.4)<br>n = 28<br>0.98 per 1000<br>person-years          | 2.5 (2.1-2.9)<br>n = 188<br>1.39 per 1000<br>person-years     | 1.4 (1.0-2.0)<br>n = 33<br>1.15 per 1000<br>person-years |
| <i>De novo</i><br>preeclampsia<br>n = 56,419                                  | 2.5 (1.9-3.4)<br>n = 49                                           | 3.0 (2.7-3.4)<br>n = 355                                      | 2.3 (1.8-3.0)<br>n = 79                                  |

|                                                                                               |                                                       |                                                        |                                                        |
|-----------------------------------------------------------------------------------------------|-------------------------------------------------------|--------------------------------------------------------|--------------------------------------------------------|
| 0.59 per 1000 person-years                                                                    | 0.89 per 1000 person-years                            | 1.69 per 1000 person-years                             | 1.08 per 1000 person-years                             |
| Chronic HTN & Gestational HTN<br>n = 4,907<br>0.54 per 1000 person-years                      | 2.0 (0.8-4.8)<br>n = <10*<br>N/A                      | 3.3 (2.5-4.5)<br>n = 45<br>1.16 per 1000 person-years  | 3.0 (1.7-5.4)<br>n = 12<br>1.67 per 1000 person-years  |
| Chronic HTN & Preeclampsia<br>n = 5,743<br>0.61 per person-years                              | 5.0 (3.1-8.0)<br>n = 22<br>1.01 per 1000 person-years | 5.4 (4.5-6.6)<br>n = 135<br>1.36 per 1000 person-years | 7.6 (5.4-10.7)<br>n = 43<br>1.03 per 1000 person-years |
| No HTN/preeclampsia/gestational htn (referent)<br>n = 1,539,445<br>0.57 per 1000 person-years | 1.0<br>n=407<br>1.00 per 1000 person-years            | 1.0<br>n = 2,409<br>1.17 per 1000 person-years         | 1.0<br>n = 769<br>1.01 per 1000 person-years           |
| Gestational DM<br>n = 107,636<br>0.59 per 1000 person-years                                   | 1.0 (0.8-1.4)<br>n=57<br>0.88 per 1000 person-years   | 1.3 (1.1-1.4)<br>n = 320<br>1.36 per 1000 person-years | 1.42(1.2-1.8)<br>n = 103<br>1.09 per 1000 person-years |
| No Gestational DM (referent)<br>n=1,554,409<br>0.58 per 1000 person-years                     | 1.0<br>n=501<br>1.00 per 1000 person-years            | 1.0<br>n=2964<br>1.22 per 1000 person-years            | 1.0<br>n=870<br>1.01 per 1000 person-years             |
| IUGR<br>n = 23,504<br>0.59 per 1000 person-years                                              | 1.6 (1.1-2.5)<br>n = 23<br>1.11 per 1000 person-years | 1.1 (0.9-1.4)<br>n = 86<br>1.22 per 1000 person-years  | 1.5 (1.0-2.1)<br>n = 30<br>1.09 per 1000 person-years  |
| No IUGR (referent)<br>n=1,638,541                                                             | 1.0<br>n=535                                          | 1.0<br>n=3198                                          | 1.0<br>n=943                                           |

|                                                                      |                                                      |                                                      |                                                      |
|----------------------------------------------------------------------|------------------------------------------------------|------------------------------------------------------|------------------------------------------------------|
| 0.58 per 1000 person-years                                           | 0.98 per 1000 person-years                           | 1.23 per 1000 person-years                           | 1.02 per 1000 person-years                           |
| Preterm birth<br>n=116,768<br>0.58 per 1000 person-years             | 1.8 (1.4-2.3)<br>n=105<br>1.05 per 1000 person-years | 1.6 (1.4-1.7)<br>n=532<br>1.25 per 1000 person-years | 1.4 (1.1-1.6)<br>n=134<br>1.05 per 1000 person-years |
| Preterm birth(referent)<br>n=1,545,277<br>0.58 per 1000 person-years | 1.0<br>n=453<br>0.97 per 1000 person-years           | 1.0<br>n=2752<br>1.23 per 1000 person-years          | 1.0<br>n=839<br>1.01 per 1000 person-years           |

25 \* In accordance with HCUP policies, categories in which there were fewer than 10 patients are represented simply as <10.

26 MV = Multivariate; HR = Hazard Ratio; CI = Confidence Interval; HDP = Hypertensive Disorders of Pregnancy; PPCM = Peripartum

27 Cardiomyopathy; HTN = Hypertension; DM = Diabetes Mellitus; IUGR = Intrauterine Growth Restriction.



28 **Table 3. Number of patients in study cohort with CVD outcomes of interest by outcome subtype.**

|                                           | MI    |        | Stroke  |          |             | Heart Failure |
|-------------------------------------------|-------|--------|---------|----------|-------------|---------------|
|                                           | MICAD | MINOCA | Embolic | Ischemic | Hemorrhagic |               |
| PPCM (n=558)                              | <10*  | <10*   | <10*    | <10*     | 0           | 56            |
| Chronic HTN (n=12,458)                    | 14    | <10*   | <10*    | 28       | <10*        | 152           |
| <i>De Novo</i> Gestational HTN (n=43,073) | <10*  | <10*   | <10*    | 22       | <10*        | 188           |
| <i>De Novo</i> Preeclampsia (n=56,419)    | 16    | <10    | <10     | 60       | 14          | 355           |
| Chronic HTN & Gestational HTN (n=4,907)   | <10*  | 0      | <10*    | <10*     | <10*        | 45            |
| Chronic HTN & Preeclampsia (n=5,743)      | <10*  | 0      | <10*    | 35       | <10*        | 135           |
| Gestational DM (n=107,636)                | 24    | <10*   | 12      | 62       | 29          | 320           |
| Preterm Birth (n=116,768)                 | 42    | 15     | 13      | 96       | 25          | 532           |
| IUGR (n=23,504)                           | <10*  | <10*   | <10*    | 17       | <10*        | 86            |
| Total                                     | 126   | 40     | 53      | 333      | 91          | 1251          |

29 \* In accordance with HCUP policies, categories in which there were fewer than 10 patients are represented simply as <10.

30 MI = Myocardial Infarction; MICAD = MI with obstructive coronary artery disease; MINOCA = MI without obstructive coronary  
 31 artery disease; PPCM = Peripartum Cardiomyopathy; HTN = Hypertension; DM = Diabetes Mellitus; IUGR = Intrauterine Growth  
 32 Restriction.

33 **Figures**

34

35 **Figure 1.**

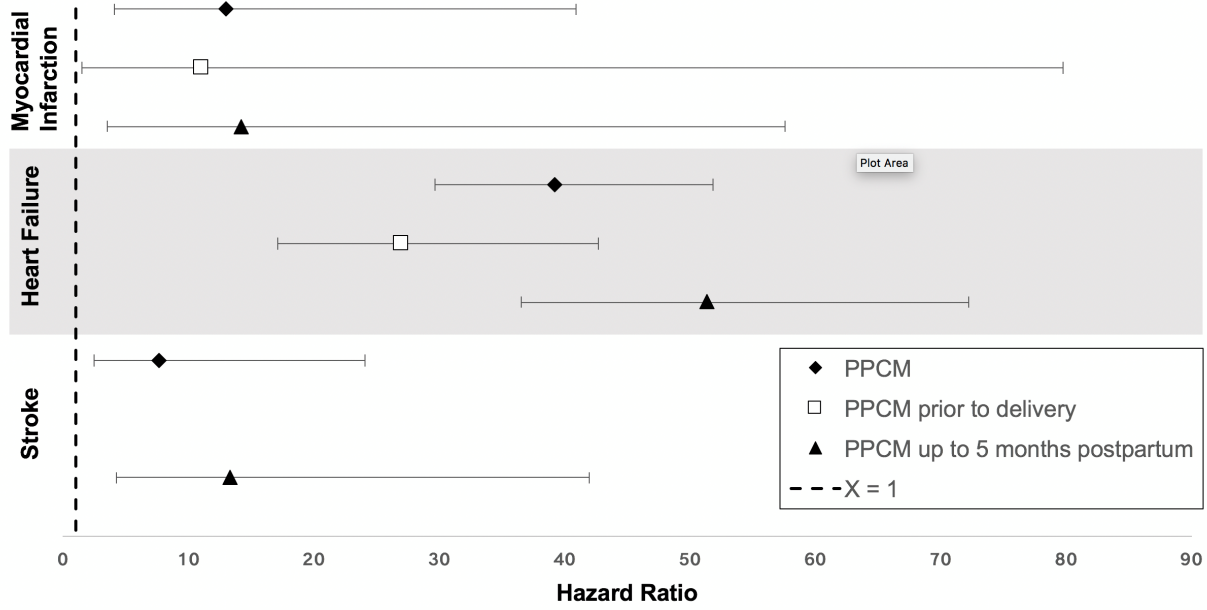

36

37 **Figure 2.**

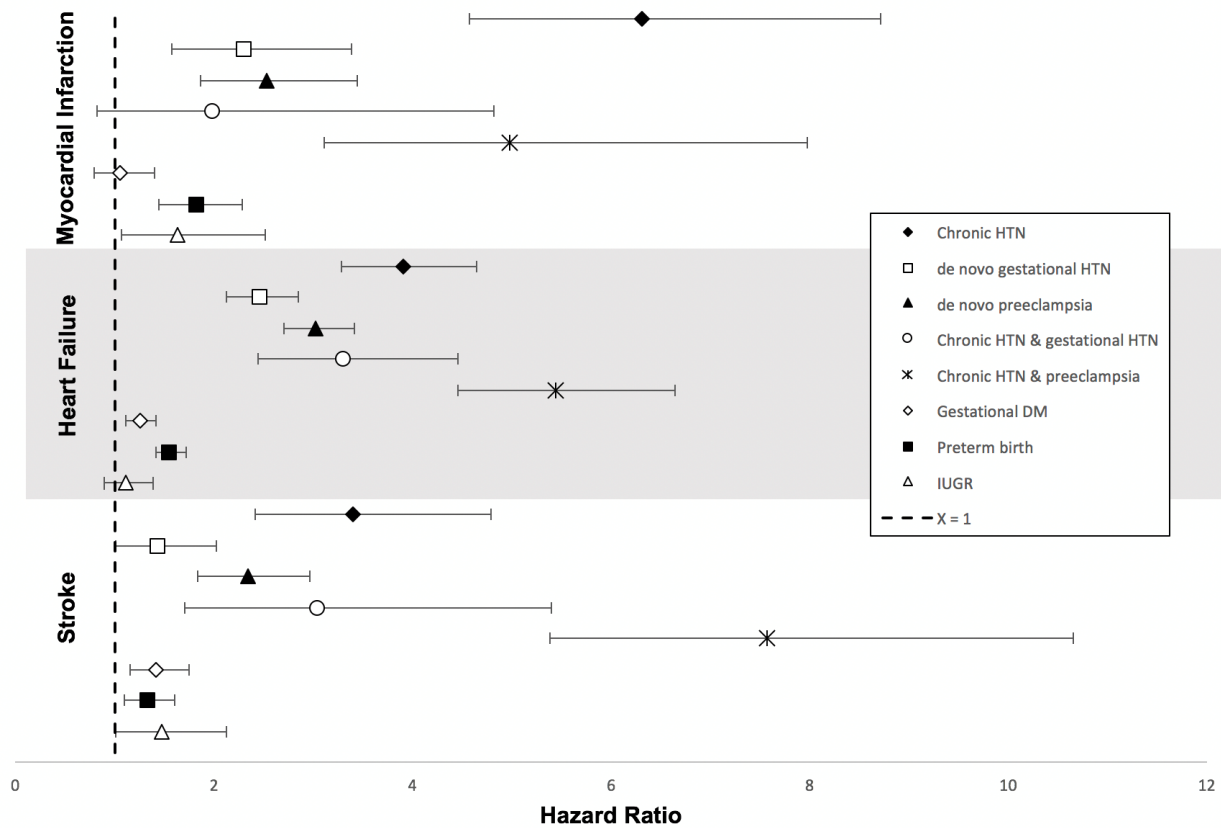

38
